# Supplementary material for: Association of Different Types of Childhood Maltreatment With Emotional Responding and Response Control Among Youths
Source: PubMed Central journal article supplement (PMC6632148; doi:10.1001/jamanetworkopen.2019.4604), 2019-05-24
Supplement: jamanetwopen-2-e194604-s001.pdf [file jamanetwopen-2-e194604-s001.pdf]

## Supplementary Online Content

Blair KS, Aloï J, Crum K, et al. Association of different types of childhood maltreatment with emotional responding and reponse control among youths. *JAMA Netw Open*. 2019;2(5):e194604. doi:10.1001/jamanetworkopen.2019.4604.

**eFigure.** Task Illustration

**eAppendix 1.** Further Details on Consent and Assent Procedure and Exclusion Criteria

**eAppendix 2.** Details on the Affective Stroop Task

**eAppendix 3.** Details of Scanning Parameters

**eAppendix 4.** Behavioral and Movement Data

**eTable 1.** Clinical Correlations

**eTable 2.** Analysis of Significant Areas of Activation for Total CTQ Score Not Reported in Table 2

**eTable 3.** Analysis of Significant Areas of Activation for Abuse vs Neglect Not Reported in Table 2.

**eTable 4.** Analysis of Significant Areas of Activation for Total CTQ Score Reported in Table 2 With Added Covariates for Recruitment and Clinical Diagnoses

**eTable 5.** Analysis of Significant Areas of Activation for Abuse vs Neglect Reported in Table 2 With Added Covariates for Recruitment and Clinical Diagnoses

**eTable 6.** Analysis of Significant Areas of Activation for Abuse: EA vs PA

**eTable 7.** Analysis of Significant Areas of Activation for SA: SA vs EA, PA, EN, and PN

**eTable 8.** Analysis of Significant Area of Activation for Neglect: EN vs PN

**eTable 9.** Analysis of Significant Areas of Activation for Abuse as the Only Covariate

**eTable 10.** Analysis of Significant Areas of Activation for Neglect as the Only Covariate

This supplementary material has been provided by the authors to give readers additional information about their work.

**eFigure.** Task Illustration

Example of **(a)** Negative Incongruent, **(b)** Negative Congruent, and **(c)** Negative View trial.

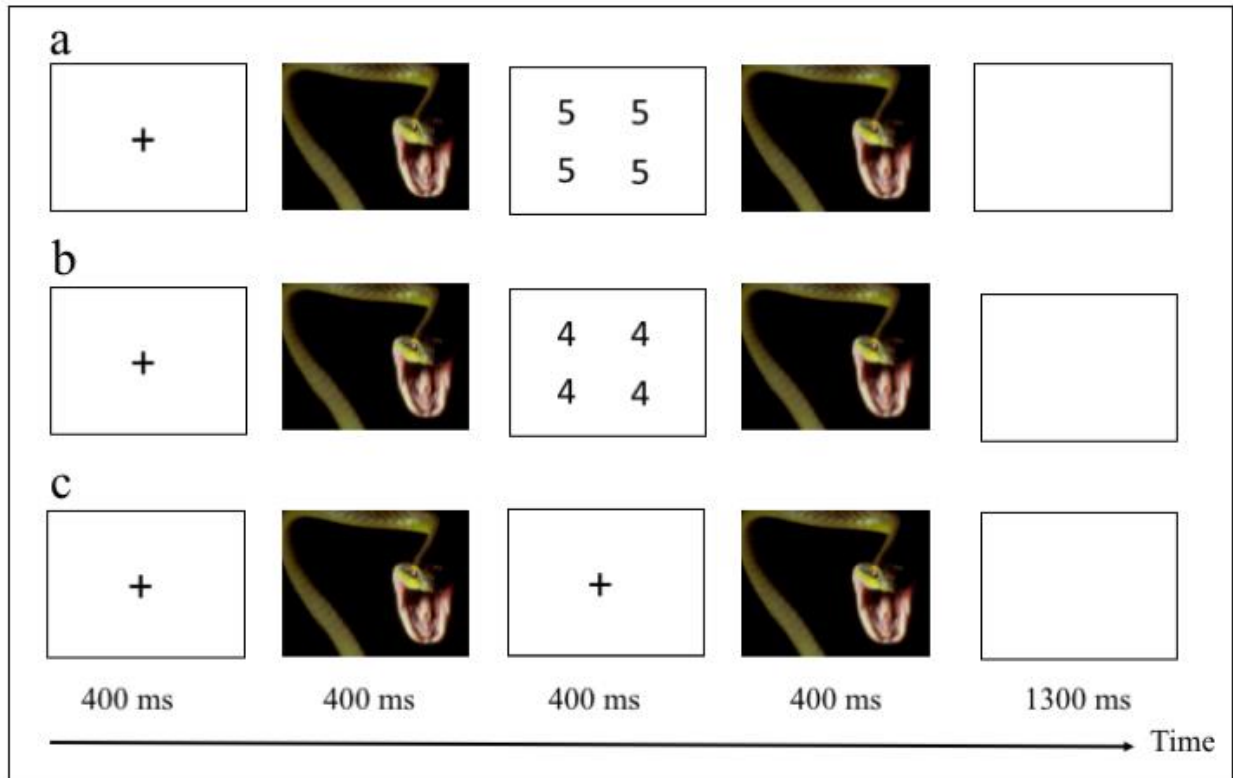

## **eAppendix 1.** Further Details on Consent and Assent Procedure And Exclusion Criteria

### **Participants**

*Consent and Assent.* A doctoral-level researcher obtained informed consent from a parent/legal guardian. Consent was either obtained at time of admission to residential treatment, or over the phone shortly after admission. Youth were approached for assent after parental consent had been obtained, and was conducted by a member of the research team. For youth not in residential treatment, both consent and assent was obtained at the beginning of data collection. In all cases, youth have the right to decline participation at any time before or during the study. It was made clear to all participants and their parents/legal guardians that their decision with respect to participation had no influence on their clinical care.

*Exclusion criteria.* Exclusion criteria included IQ<80 assessed with the Wechsler Abbreviated Scale of Intelligence-II (WASI two-subtest form),<sup>28</sup> current psychosis, pervasive developmental disorders, Tourette's disorder, neurological disorders, pregnancy, non-psychiatric medical conditions that require the use of medication that may have psychotropic effects (e.g., beta blockers or steroids), presence of metallic objects in the body (e.g., metal plates, pacemakers), and claustrophobia. Current psychiatric conditions (other than psychotic disorders or pervasive developmental disorders) were not exclusionary. Use of psychotropic medications for psychiatric indications (e.g., stimulants, selective serotonin reuptake inhibitors) were not exclusionary. However, participants on stimulant medication were asked to withhold medication on the day of the scan. Six potential participants were excluded due to MRI incompatible dental work (e.g., braces). In addition, another 6 participants refused participation on the task due to the task being too difficult/ they did not like it.

## **eAppendix 2.** Details on the Affective Stroop Task

The affective Stroop task was adapted from prior work by our group.<sup>23,31</sup> The emotional stimuli consisted of 16 negative, 16 neutral, and 16 positive pictures selected from the International Affective Picture System (IAPS).<sup>32</sup> The individual cognitive task stimuli consisted of displays of numbers and the cognitive task involved deciding how many numbers were displayed in each display (see Supplemental Figure 1). Specifically, participants pressed button 3, 4, 5, or 6 to indicate whether there were 3, 4, 5, or 6 numbers in the display.

Each trial began with a fixation point presented in the middle of the screen. For trials involving a goal-directed task (*task* trials), the fixation point was replaced by an image presented for 400ms, followed by the numerical display presented for 400ms, followed by the image presented for a further 400ms, followed by a blank stimulus for 1300ms. On incongruent or difficult task trials, the Arabic numeral distracter information was inconsistent with the numerosity information (e.g., four 5s; see eFigure 1a). On congruent task trials, the Arabic numeral distracter information was consistent with the numerosity information; (e.g., four 4s; see eFigure 1b). For the view or no task trials (*view* trials; see eFigure 1c) the numerical display was simply replaced by a fixation point.

There were two runs, each consisting of 16 presentations of each Valence-by-task Condition randomized throughout the run. In addition, 40 fixation points (staying on the screen for the duration of a condition trial 2500ms) were randomly presented throughout each run. Thus, each participant was presented with 32 trials of each Valence-by-Task Condition across the two runs.

### **eAppendix 3. Details of Scanning Parameters**

Whole-brain blood oxygen level dependent (BOLD) fMRI data were acquired using a 3.0 Tesla Siemens Skyra Magnetic Resonance Scanner. A total of 384 functional images were taken, divided over two runs, with a T2\* weighted gradient echo planar imaging (EPI) sequence (repetition time (TR)=2500ms, echo time (TE)=27ms, flip angle=90°, field-of-view (FOV)=240mm). Whole-brain coverage was obtained with 43 axial slices (thickness, 2.5mm; voxel size 2.6x2.6x2.5mm<sup>3</sup>; distance factor 21%). In the same session, a high-resolution T1-weighted anatomical image was acquired to aid with spatial normalization (MP-RAGE, repetition time=2200ms, echo time=2.48ms; 230mm field of view; 8° flip angle; 256x208 matrix) was acquired to register with the EPI dataset. Whole-brain coverage was obtained with 176 axial slices (thickness 1mm; voxel size 0.9x0.9x1mm<sup>3</sup>, distance factor 50%).

#### ***fMRI Analysis: Data Preprocessing and Individual Level Analysis***

Functional MRI data were preprocessed and analyzed using Analysis of Functional NeuroImages (AFNI) software.<sup>33</sup> Data from the first four repetitions were collected prior to magnetization equilibrium and were discarded. The anatomical scan for each participant was registered to the Talairach and Tournoux atlas<sup>34</sup> and each participant's functional EPI data were registered to their Talairach anatomical scan in AFNI. Functional images were motion corrected and spatially smoothed with a 6-mm full width half maximum Gaussian kernel. The data then underwent time series normalization and these results were multiplied by 100 for each voxel. Therefore, the resultant regression coefficients are representative of a percentage of signal change from the mean.

Following this, regressors depicting each of the response types were created by convolving the train of stimulus events with a gamma-variate haemodynamic response function

to account for the slow haemodynamic response. This involved 10 regressors (Negative View, Negative Congruent, Negative Incongruent, Neutral View, Neutral Congruent, Neutral Incongruent, Positive View, Positive Congruent, Positive Incongruent, error/ missed responses). Linear regression modelling was then performed using the regressors described above plus regressors to model a first order baseline drift function. This produced for each voxel and each regressor, a beta coefficient and its associated t-statistic.

## **eAppendix 4. Behavioral and Movement Data**

### **Statistical Analyses Performed**

*Behavioral and movement data:* The reaction time (RT) and accuracy data were analysed using two separate 2 (Sex: Male, Female) by 2 (Task Condition: Congruent, Incongruent) by 3 (Valence (Sex: Male, Female) by 2 (Task Condition: Congruent, Incongruent) by 3 (Valence: Negative, Neutral, Positive) ANCOVAs with BLOM transformed CTQ Total scores as the covariate.

Correlation analyses were conducted to determine the associations between BLOM transformed CTQ total scores, abuse (EA+SA+PA) and neglect (EN+PN) scores, and censored volumes, average motion per volume, and maximum displacement during scanning. Volumes were censored if there was >0.5 mm motion across adjacent volumes. For all these analyses significance was considered at  $p < 0.05$ .

### **Results**

#### **Behavioral data**

There were main effects of task for both RT and accuracy ( $F(1,113)=245.71$  &  $65.16$ ,  $p < 0.001$  for both;  $\eta^2=0.676$  &  $0.366$  respectively), responses to incongruent relative to congruent task trials were slower ( $M[\text{Incongruent}] = 848.60$ ; 95% CI, 808.78-888.42);  $M[\text{Congruent}] = 790.10$ ; 95% CI, 750.57-829.62), and less accurate ( $M[\text{Incongruent}] = 24.43$ ; 95% CI, 23.31-25.54);  $M[\text{Congruent}] = 26.40$ ; 95% CI, 25.51-27.29). There was also a main effect of valence for RT ( $F(2,226)=6.89$ ,  $p=0.004$ ;  $\eta^2=0.049$ ); participants were slower for both negative and positive relative to neutral trials ( $F(1,115)=6.31$  &  $10.68$  respectively;  $p=0.013$  &  $0.001$ ;  $\eta^2=0.052$  &  $0.085$ ; ( $M[\text{Negative}] = 825.91$ ; 95% CI, 786.56-865.36);  $M[\text{Neutral}] = 815.31$ ; 95% CI,

776.56-854.07) M[Positive]=827.56; 95% CI, 789.72-865.41). Two additional 2 (Sex) by 2 (Task Condition: Congruent, Incongruent) by 3 (Valence: Negative, Neutral, Positive) ANCOVAs were conducted on the RT and accuracy data with BLOM transformed Abuse (emotional, sexual, physical) and Neglect (emotional, physical) amount scores as the covariates. These ANOVAs revealed the same main effects of task ( $F(1,112)=242.12$  &  $63.87$ ,  $p<0.00$ ;  $\eta^2=0.369$  &  $0.085$ , for accuracy and RT respectively) and valence (again RT only:  $F(2,224)=6.95$ ,  $p<0.001$ ;  $\eta^2=0.049$ ). However, there were no significant interactions of amount of abuse or neglect with task variables.

### **Movement data**

There were no significant correlations between CTQ Total Score, abuse, neglect, or any of the abuse or neglect sub-scores (EA, SA, PA, EN, PN) and censored volumes ( $r$  range=0.004 to 0.082; ns), average motion per volume ( $r$  range=0.004 to 0.084; ns), and maximum displacement during scanning ( $r$  range=0.001 to 0.072; ns). No participant had >6% censored volumes.



**eTable 1.** Clinical Correlations

| Correlations ( <i>r</i> ) | CTQ: Total | CTQ: Abuse | CTQ: Neglect |
|---------------------------|------------|------------|--------------|
| CD                        | .365**     | .313**     | .338**       |
| ADHD                      | .239**     | .213*      | .204*        |
| MDD                       | .324**     | .253**     | .327**       |
| GAD                       | .378**     | .354**     | .295**       |
| SAD                       | .256**     | .227*      | .240**       |
| PTSD                      | .455**     | .483**     | .267**       |

CD=Conduct Disorder; ADHD=Attentional Deficit Hyperactivity Disorder; MDD=Major Depressive Disorder; GAD=Generalized Anxiety Disorder; SAD=Social Anxiety Disorder; PTSD=Post Traumatic Stress Disorder. CTQ=Childhood Trauma Questionnaire. Abuse comprised of combined emotional, physical and sexual abuse scores. Neglect comprised of combined emotional and physical neglect scores. For correlational analysis, diagnosis coded as No Diagnosis=0, Diagnosis=1 \*\* . Correlation is significant at the 0.001 level (2-tailed). \* . Correlation is significant at the 0.05 level (2-tailed).

**eTable 2.** Analysis of Significant Areas of Activation for Total CTQ Score Not Reported in Table 2

| <b>REGION</b>                                                | <b>BA</b> | <b>Voxels</b> | <b>X</b> | <b>Y</b> | <b>Z</b> | <b>F-value</b> |
|--------------------------------------------------------------|-----------|---------------|----------|----------|----------|----------------|
| <i>Sex</i>                                                   |           |               |          |          |          |                |
| R middle frontal gyrus                                       | 8         | 47            | 25.5     | 25.5     | 38.5     | 24.77          |
| L cingulate cortex                                           | 32        | 28            | -1.5     | 10.5     | 38.5     | 15.44          |
| R paracentral lobule                                         | 4/6       | 37            | 7.5      | -34.5    | 65.5     | 17.28          |
| R inferior parietal lobule                                   | 40        | 29            | 37.5     | -49.5    | 47.5     | 18.39          |
| <i>Valence<sup>^</sup></i>                                   |           |               |          |          |          |                |
| L middle frontal gyrus                                       | 47        | 43            | -34.5    | 31.5     | -3.5     | 25.03          |
| L middle frontal gyrus                                       | 9         | 36            | -40.5    | 19.5     | 26.5     | 16.12          |
| R inferior frontal gyrus                                     | 9         | 138           | 34.5     | 7.5      | -29.5    | 23.21          |
| L amygdala                                                   |           | 56            | -19.5    | -4.5     | -9.5     | 25.33          |
| R amygdala                                                   |           | 45            | 19.5     | -4.5     | -12.5    | 25.89          |
| L parahippocampal gyrus                                      | 36        | 77            | -28.5    | -40.5    | -6.5     | 29.47          |
| R parahippocampal gyrus                                      | 36        | 69            | 28.5     | -40.5    | -6.5     | 26.80          |
| R sTG                                                        | 22        | 38            | 61.5     | -19.5    | 2.5      | 13.00          |
| L/R culmen/ fusiform gyrus/ cuneus/ inferior occipital gyrus | 17/37     | 3054          | 40.5     | -40.5    | -21.5    | 99.10          |
| <i>Task<sup>^</sup></i>                                      |           |               |          |          |          |                |
| L inferior frontal gyrus                                     | 47        | 392           | -37.5    | 28.5     | -3.5     | 57.92          |

|                                      |      |        |       |       |       |       |
|--------------------------------------|------|--------|-------|-------|-------|-------|
| R inferior frontal gyrus             | 46   | 203    | 52.5  | 25.5  | 14.5  | 36.52 |
| R medial frontal gyrus               | 9    | 129    | 4.5   | 43.5  | 32.5  | 15.31 |
| L superior frontal gyrus             | 8    | 34     | -19.5 | 28.5  | 50.5  | 14.64 |
| L ACC                                | 39   | 389    | -4.5  | 43.5  | -0.5  | 35.90 |
| R precentral gyrus                   | 4    | 109    | 28.5  | -25.5 | 50.5  | 33.80 |
| L precentral gyrus                   | 6    | 34     | -43.5 | -13.5 | 35.5  | 32.31 |
| L paracentral lobule                 | 6    | 158    | -4.5  | -31.5 | 59.5  | 38.39 |
| R amygdala/<br>parahippocampal gyrus |      | 51     | 19.5  | -4.5  | -15.5 | 32.42 |
| L amygdala/<br>parahippocampal gyrus |      | 222    | -28.5 | -28.5 | -12.5 | 31.48 |
| L PCC                                | 23   | 162    | -4.5  | -28.5 | 26.5  | 58.86 |
| L PCC                                | 29   | 32     | -7.5  | -49.5 | 11.5  | 19.51 |
| L precuneus                          | 39   | 236    | -43.5 | -70.5 | 35.5  | 29.03 |
| R precuneus                          | 31   | 83     | 7.5   | -46.5 | 32.5  | 17.86 |
| L mTG                                | 21   | 189    | -52.5 | 25.5  | 14.5  | 22.17 |
| R mTG                                | 21   | 182    | 58.5  | -43.5 | 2.5   | 18.82 |
| R mTG                                | 21   | 83     | 52.5  | -7.5  | -9.5  | 19.13 |
| L mTG                                | 21   | 27     | -61.5 | -40.5 | 2.5   | 13.87 |
| L/R cerebellum/ cuneus/<br>precuneus | 7/17 | 188861 | -28.5 | -40.5 | -27.5 | 99.60 |
| <b><i>Task-by-Sex</i></b>            |      |        |       |       |       |       |
| L precentral gyrus                   | 4    | 29     | -19.5 | -25.5 | 65.5  | 11.81 |

Activations are effects observed in whole brain analyses significant at  $p < 0.001$ , corrected for multiple comparisons (significant at  $p < 0.05$ ), except  $\wedge p < 0.0001$  corrected for multiple comparisons (significant at  $p < 0.05$ ).

**eTable 3.** Analysis of Significant Areas of Activation for Abuse Vs Neglect Not Reported in Table 2

| <b>REGION</b>                                                 | <b>BA</b> | <b>Voxels</b> | <b>X</b> | <b>Y</b> | <b>Z</b> | <b>F-value</b> |
|---------------------------------------------------------------|-----------|---------------|----------|----------|----------|----------------|
| <i>Neglect</i>                                                |           |               |          |          |          |                |
| R lingual gyrus                                               | 18        | 28            | 1.5      | -76.5    | 2.5      | 14.91          |
| <i>Sex</i>                                                    |           |               |          |          |          |                |
| R paracentral lobule                                          | 5         | 28            | 1.5      | -37.5    | 56.5     | 14.17          |
| <i>Abuse-by-Neglect</i>                                       |           |               |          |          |          |                |
| L parahippocampal gyrus                                       | 36        | 56            | -40.5    | -31.5    | -21.5    | 19.31          |
| <i>Valence<sup>^</sup></i>                                    |           |               |          |          |          |                |
| L middle frontal gyrus                                        | 47        | 44            | -34.5    | 31.5     | -3.5     | 24.51          |
| L middle frontal gyrus                                        | 9         | 38            | -37.5    | 19.5     | 26.5     | 16.86          |
| R inferior frontal gyrus                                      | 46        | 117           | 52.5     | 31.5     | 11.5     | 25.72          |
| R inferior frontal gyrus                                      | 47        | 20            | 28.5     | 28.5     | -6.5     | 17.87          |
| L amygdala/ parahippocampal gyrus                             |           | 67            | -19.5    | -4.5     | -9.5     | 23.24          |
| R amygdala/ parahippocampal gyrus                             |           | 71            | 31.5     | -40.5    | -3.5     | 24.99          |
| L parahippocampal gyrus                                       |           | 60            | -31.5    | -40.5    | -3.5     | 25.21          |
| R sTG                                                         | 21        | 26            | 55.5     | -22.5    | -0.5     | 12.62          |
| L culmen/ fusiform gyrus/<br>cuneus/ inferior occipital gyrus |           | 1170          | -37.5    | -40.5    | -15.5    | 99.80          |
| R culmen/ fusiform gyrus/<br>cuneus/ inferior occipital gyrus |           | 1565          | 37.5     | -40.5    | -18.5    | 99.20          |

| <i>Task</i> <sup>^</sup>          |      |       |       |       |       |        |
|-----------------------------------|------|-------|-------|-------|-------|--------|
| R middle frontal gyrus            | 9    | 240   | 40.5  | 34.5  | 26.5  | 23.93  |
| L inferior frontal gyrus          | 47   | 620   | -37.5 | 28.5  | -3.5  | 48.47  |
| R inferior frontal gyrus          | 46   | 166   | 52.5  | 25.5  | 14.5  | 32.61  |
| R medial frontal gyrus            | 9    | 39    | 4.5   | 43.5  | 32.5  | 13.30  |
| R precentral gyrus                | 4    | 113   | 28.5  | -25.5 | 50.5  | 33.60  |
| L PCC                             | 31   | 104   | -10.5 | -43.5 | 35.5  | 22.52  |
| L PCC                             | 23   | 129   | -4.5  | -28.5 | 26.5  | 42.98  |
| L PCC                             | 39   | 28    | -7.5  | -49.5 | 11.5  | 19.22  |
| L paracentral lobule              | 6    | 145   | -4.5  | -31.5 | 59.5  | 31.36  |
| L precentral gyrus                | 6    | 31    | -43.5 | -13.5 | 35.5  | 25.88  |
| R amygdala/ parahippocampal gyrus |      | 38    | 19.5  | -4.5  | -15.5 | 21.45  |
| L amygdala/ parahippocampal gyrus |      | 218   | -31.5 | -31.5 | -9.5  | 30.37  |
| L mTG                             | 21   | 123   | -49.5 | -4.5  | -15.5 | 20.05  |
| R sTG                             | 39   | 142   | 43.5  | -49.5 | 17.5  | 17.57  |
| L sTG                             | 39   | 237   | -52.5 | -61.5 | 29.5  | 21.83  |
| R sTG                             | 21   | 62    | 49.5  | 1.5   | -12.5 | 21.09  |
| L/R cerebellum/ cuneus/ precuneus | 7/17 | 15647 | 34.5  | -40.5 | -30.5 | 100.00 |

Activations are effects observed in whole brain analyses significant at  $p < 0.001$ , corrected for multiple comparisons (significant at  $p < 0.05$ ), except <sup>^</sup> $p < 0.0001$  corrected for multiple comparisons (significant at  $p < 0.05$ ).

**eTable 4.** Analysis of Significant Areas of Activation for Total CTQ Score Reported in Table 2  
With Added Covariates for Recruitment and Clinical Diagnoses

| REGION                                          | BA   | Voxels | X     | Y     | Z     | F-value |
|-------------------------------------------------|------|--------|-------|-------|-------|---------|
| <b>CTQ Total Score</b>                          |      |        |       |       |       |         |
| <i>CTQ Total Score-by-Task Condition</i>        |      |        |       |       |       |         |
| <i>(A) Original Analysis</i>                    |      |        |       |       |       |         |
| R mid-cingulate cortex                          | 31/6 | 51     | 7.5   | -22.5 | 47.5  | 12.76   |
| R postcentral gyrus                             | 3    | 59     | 40.5  | -25.5 | 56.5  | 9.81    |
| L post/precentral gyrus/ premotor cortex gyrus  | 43   | 59     | -52.5 | -7.5  | 17.5  | 11.73   |
| L mTG                                           | 21   | 35     | -55.5 | -13.5 | -6.5  | 13.24   |
| L sTG                                           | 22   | 26     | -43.5 | -25.5 | -0.5  | 10.33   |
| L declive/ culmen                               |      | 76     | -13.5 | -58.5 | -12.5 | 13.76   |
| <i>(B) With Added Community Covariate</i>       |      |        |       |       |       |         |
| 4R mid-cingulate cortex                         | 31/6 | 37     | 7.5   | -22.5 | 47.5  | 10.76   |
| 3R postcentral gyrus                            | 3    | 40     | 49.5  | -22.5 | 44.5  | 10.68   |
| 1L post/precentral gyrus/ premotor cortex gyrus | 43   | 56     | -55.5 | -13.5 | 20.5  | 8.89    |
| 2L mTG                                          | 21   | 55     | -55.5 | -13.5 | -6.5  | 10.61   |
| 9L sTG*                                         | 22   | 16     | -43.5 | -25.5 | -0.5  | 6.23    |
| 8L declive/ culmen*                             |      | 16     | -13.5 | -61.5 | -185  | 7.07    |
| <i>(C) With Added CD Covariate</i>              |      |        |       |       |       |         |
| 14R mid-cingulate cortex                        | 31/6 | 24     | 7.5   | -22.5 | 47.5  | 8.51    |

|                                                 |      |     |       |       |       |       |
|-------------------------------------------------|------|-----|-------|-------|-------|-------|
| 7R postcentral gyrus                            | 3    | 48  | 52.5  | -22.5 | 47.5  | 7.52  |
| 4L post/precentral gyrus/ premotor cortex gyrus | 43   | 84  | -52.5 | -7.5  | 17.5  | 11.78 |
| 2L mTG/ sTG                                     | 21   | 150 | -55.5 | -13.5 | -6.5  | 11.80 |
| 1L declive/ culmen                              |      | 259 | -13.5 | -58.5 | -9.5  | 10.68 |
| <b><i>(D) With Added ADHD Covariate</i></b>     |      |     |       |       |       |       |
| 6R mid-cingulate cortex                         | 31/6 | 36  | 7.5   | -22.5 | 47.5  | 10.52 |
| 5R postcentral gyrus                            | 3    | 37  | 40.5  | -25.5 | 56.5  | 7.65  |
| 2L post/precentral gyrus/ premotor cortex gyrus | 43   | 74  | -55.5 | -13.5 | 20.5  | 10.96 |
| 1L mTG                                          | 21   | 82  | -55.5 | -13.5 | -6.5  | 10.38 |
| 7L sTG*                                         | 22   | 20  | -43.5 | -25.5 | 2.5   | 7.79  |
| 3L declive/ culmen                              |      | 69  | -13.5 | -58.5 | -12.5 | 9.77  |
| <b><i>(E) With Added MDD Covariate</i></b>      |      |     |       |       |       |       |
| 5R mid-cingulate cortex                         | 31/6 | 73  | 7.5   | -22.5 | 47.5  | 12.04 |
| 1R postcentral gyrus                            | 3    | 351 | 40.5  | -25.5 | 56.5  | 12.95 |
| 3L post/precentral gyrus/ premotor cortex gyrus | 43   | 75  | -52.5 | -7.5  | 17.5  | 9.03  |
| 7L mTG                                          | 21   | 52  | -58.5 | -13.5 | -3.5  | 10.15 |
| 11L sTG                                         | 22   | 26  | -43.5 | 25.5  | 2.5   | 8.26  |
| 2L declive/ culmen                              |      | 341 | -13.5 | -58.5 | -15.5 | 13.69 |
| <b><i>(F) With Added GAD Covariate</i></b>      |      |     |       |       |       |       |
| 10R mid-cingulate cortex*                       | 31/6 | 19  | 7.5   | -22.5 | 47.5  | 8.53  |
| 11R postcentral gyrus*                          | 13   | 13  | 40.5  | -25.5 | 56.5  | 7.82  |

|                                                   |      |     |       |       |       |       |
|---------------------------------------------------|------|-----|-------|-------|-------|-------|
| 25L post/precentral gyrus/ premotor cortex gyrus* | 43   | 9   | -52.5 | -7.5  | 17.5  | 7.17  |
| 4L mTG8*                                          | 21   | 19  | -58.5 | -13.5 | -3.5  | 8.19  |
| 12L sTG8*                                         | 22   | 11  | -43.5 | 25.5  | 2.5   | 7.23  |
| 1L declive/ culmen                                |      | 36  | -13.5 | -58.5 | -15.5 | 7.62  |
| <b>(G) With Added SAD Covariate</b>               |      |     |       |       |       |       |
| 6R mid-cingulate cortex                           | 31/6 | 50  | 7.5   | -22.5 | 47.5  | 8.69  |
| 1R postcentral gyrus                              | 3    | 138 | 52.5  | -19.5 | 44.5  | 9.89  |
| 5L post/precentral gyrus/ premotor cortex gyrus   | 43   | 67  | -52.5 | -7.5  | 17.5  | 11.77 |
| 8L mTG                                            | 21   | 30  | -55.5 | -13.5 | -6.5  | 8.92  |
| 9L sTG                                            | 22   | 30  | -40.5 | -25.5 | 2.5   | 10.33 |
| 2L declive/ culmen                                |      | 133 | -25.5 | -46.5 | -21.5 | 8.84  |
| <b>(H) With Added PTSD Covariate</b>              |      |     |       |       |       |       |
| 6R mid-cingulate cortex                           | 31/6 | 31  | 7.5   | -22.5 | 47.5  | 8.25  |
| 9R postcentral gyrus*                             | 3    | 19  | 40.5  | -28.5 | 56.5  | 7.47  |
| 3L post/precentral gyrus/ premotor cortex gyrus   | 43   | 83  | -52.5 | -7.5  | 17.5  | 11.23 |
| 1L mTG/ sTG                                       | 21   | 114 | -55.5 | -13.5 | -6.5  | 11.13 |
| 2L declive/ culmen                                |      | 96  | -13.5 | -58.5 | -15.5 | 10.30 |

(A) Original data reported in Table 2, significant at  $p < 0.001$ , corrected for multiple comparisons (significant at  $p < 0.05$ ). (B to H) Added covariate involving (B) recruitment (community v. residential care); (C) CD (present v. not present); (D) ADHD (present v. not present); (E) MDD (present v. not present); (F) GAD (present v. not present); (G) SAD (present v. not present); and (H) PTSD (present v. not present). Activations are from whole brain analyses significant at



p<0.005, corrected for multiple comparisons significant at p<0.05 (except \* not corrected for multiple comparisons).

**eTable 5.** Analysis of Significant Areas of Activation for Abuse vs Neglect Reported in Table 2  
With Added Covariates for Recruitment and Clinical Diagnoses

| REGION                                            | BA      | Voxels | X     | Y     | Z    | F-value |
|---------------------------------------------------|---------|--------|-------|-------|------|---------|
| <b>Abuse vs. Neglect Score</b>                    |         |        |       |       |      |         |
| <i>(A) Original Analysis</i>                      |         |        |       |       |      |         |
| <i>Abuse-by-Task Condition</i>                    |         |        |       |       |      |         |
| L rmPFC                                           | 9       | 54     | -16.5 | 49.5  | 26.5 | 10.36   |
| R mid-cingulate cortex                            | 31/6    | 52     | 7.5   | -22.5 | 47.5 | 13.96   |
| R postcentral gyrus/<br>inferior parietal lobule  | 40      | 235    | 31.5  | -37.5 | 53.5 | 15.21   |
| L pre/postcentral gyrus/<br>premotor cortex       | 6       | 109    | -49.5 | -7.5  | 23.5 | 11.16   |
| R pre/postcentral gyrus                           | 3       | 30     | 61.5  | -10.5 | 23.5 | 13.30   |
| <i>Neglect-by-Task Condition</i>                  |         |        |       |       |      |         |
| R cuneus                                          | 18      | 62     | 7.5   | -76.5 | 17.5 | 10.28   |
| <i>(C) With Added CD Covariate</i>                |         |        |       |       |      |         |
| <i>Abuse-by-Task Condition</i>                    |         |        |       |       |      |         |
| 2L/R rmPFC/ACC                                    | 9/24    | 550    | 10.5  | 28.5  | -6.5 | 10.40   |
| 7R mid-cingulate cortex                           | 24/31/6 | 69     | 10.5  | -19.5 | 44.5 | 12.92   |
| 3R postcentral gyrus/<br>inferior parietal lobule | 40      | 283    | 31.5  | -37.5 | 53.5 | 12.69   |
| 4L pre/postcentral gyrus/<br>premotor cortex      | 6/3     | 153    | -55.5 | -10.5 | 20.5 | 11.67   |
| 3R pre/postcentral gyrus                          | 3/40    | 283    | 31.5  | -37.5 | 53.5 | 12.72   |
| <i>Neglect-by-Task Condition</i>                  |         |        |       |       |      |         |

|                                                      |      |     |       |       |      |       |
|------------------------------------------------------|------|-----|-------|-------|------|-------|
| R cuneus                                             | 18   | 62  | 7.5   | -76.5 | 17.5 | 10.28 |
| <b><i>(D) With Added ADHD Covariate</i></b>          |      |     |       |       |      |       |
| <b><i>Abuse-by-Task Condition</i></b>                |      |     |       |       |      |       |
| L rmPFC                                              |      |     |       |       |      |       |
| R mid-cingulate cortex                               | 31/6 | 52  | 7.5   | -22.5 | 47.5 | 13.96 |
| R postcentral gyrus/<br>inferior parietal lobule     | 40   | 235 | 31.5  | -37.5 | 53.5 | 15.21 |
| L pre/postcentral gyrus/<br>premotor cortex          | 6    | 109 | -49.5 | -7.5  | 23.5 | 11.16 |
| R pre/postcentral gyrus                              | 3    | 30  | 61.5  | -10.5 | 23.5 | 13.30 |
| <b><i>Neglect-by-Task Condition</i></b>              |      |     |       |       |      |       |
| R cuneus                                             | 18   | 62  | 7.5   | -76.5 | 17.5 | 10.28 |
| <b><i>(E) With Added MDD Covariate</i></b>           |      |     |       |       |      |       |
| <b><i>Abuse-by-Task Condition</i></b>                |      |     |       |       |      |       |
| L rmPFC                                              |      |     |       |       |      |       |
| R mid-cingulate cortex                               | 31/6 | 52  | 7.5   | -22.5 | 47.5 | 13.96 |
| R postcentral gyrus/<br>inferior parietal lobule     | 40   | 235 | 31.5  | -37.5 | 53.5 | 15.21 |
| L pre/postcentral gyrus/<br>premotor cortex          | 6    | 109 | -49.5 | -7.5  | 23.5 | 11.16 |
| R pre/postcentral gyrus*                             | 3    | 30  | 61.5  | -10.5 | 23.5 | 13.30 |
| <b><i>(F) With Added GAD Covariate</i></b>           |      |     |       |       |      |       |
| <b><i>Abuse-by-Task Condition</i></b>                |      |     |       |       |      |       |
| 2L rmPFC                                             | 9    | 93  | -10.5 | 46.5  | 20.5 | 8.81  |
| 5R mid-cingulate cortex                              | 31/6 | 28  | 7.5   | -22.5 | 47.5 | 9.99  |
| 1R postcentral gyrus/<br>2L inferior parietal lobule | 40   | 163 | -52.5 | -19.5 | 41.5 | 11.03 |

|                                                      |      |     |       |       |      |       |
|------------------------------------------------------|------|-----|-------|-------|------|-------|
| L pre/postcentral gyrus*                             | 6    | 12  | -55.5 | -10.5 | 20.5 | 6.72  |
| <b><i>Neglect-by-Task Condition</i></b>              |      |     |       |       |      |       |
| R cuneus                                             | 18   | 309 | 16.5  | -88.5 | 26.5 | 11.05 |
| <b><i>(G) With Added SAD Covariate</i></b>           |      |     |       |       |      |       |
| <b><i>Abuse-by-Task Condition</i></b>                |      |     |       |       |      |       |
| 1L rmPFC                                             | 9/10 | 188 | -10.5 | 46.5  | 17.5 | 12.72 |
| 3R mid-cingulate cortex                              | 31/6 | 106 | 19.5  | -10.5 | 53.5 | 14.74 |
| 2R postcentral gyrus/<br>inferior parietal lobul     | 40   | 130 | 31.5  | -37.5 | 50.5 | 10.20 |
| 8L pre/postcentral gyrus/<br>premotor cortex/ insula | 6    | 68  | -34.5 | -7.5  | 14.5 | 9.90  |
| 81R pre/postcentral gyrus*                           | 3    | 2   | 58.5  | -10.5 | 23.5 | 5.79  |
| <b><i>Neglect-by-Task Condition</i></b>              |      |     |       |       |      |       |
| R cuneus/ posterior cingulate cortex                 | 18   | 257 | 13.5  | -49.5 | 11.5 | 9.23  |
| <b><i>(H) With Added PTSD Covariate</i></b>          |      |     |       |       |      |       |
| <b><i>Abuse-by-Task Condition</i></b>                |      |     |       |       |      |       |
| 41L rmPFC*                                           | 9    | 3   | -16.5 | 49.5  | 26.5 | 5.78  |
| 7R mid-cingulate cortex*                             | 31/6 | 15  | 10.5  | -22.5 | 44.5 | 8.24  |
| 1R postcentral gyrus/<br>inferior parietal lobule    | 40/3 | 148 | 49.5  | -19.5 | 38.5 | 11.19 |
| 2L pre/postcentral gyrus/<br>premotor cortex/ insula | 6    | 40  | -37.5 | -7.5  | 14.5 | 8.61  |
| 16R pre/postcentral gyrus/ insula*                   | 3/13 | 7   | 46.5  | -7.5  | 14.5 | 13.30 |
| <b><i>Neglect-by-Task Condition</i></b>              |      |     |       |       |      |       |
| R cuneus                                             | 18   | 547 | -4.5  | -88.5 | 20.5 | 13.16 |

(**A**) Original data reported in Table 2, significant at  $p < 0.001$ , corrected for multiple comparisons (significant at  $p < 0.05$ ). (**B** to **H**) Added covariate involving (**B**) recruitment (community v. residential care); (**C**) CD (present v. not present); (**D**) ADHD (present v. not present); (**E**) MDD (present v. not present); (**F**) GAD (present v. not present); (**G**) SAD (present v. not present); and (**H**) PTSD (present v. not present). Activations are from whole brain analyses significant at  $p < 0.005$ , corrected for multiple comparisons significant at  $p < 0.05$  (except \* not corrected for multiple comparisons).

**eTable 6.** Analysis of Significant Areas of Activation for Abuse: EA vs PA

| <b>REGION</b>                                                 | <b>BA</b> | <b>Voxels</b> | <b>X</b> | <b>Y</b> | <b>Z</b> | <b>F-value</b> |
|---------------------------------------------------------------|-----------|---------------|----------|----------|----------|----------------|
|                                                               |           |               |          |          |          |                |
| <i><b>EA-by-Task</b></i>                                      |           |               |          |          |          |                |
| R inferior parietal lobule                                    | 40        | 40            | 31.5     | -37.5    | 53.5     | 13.68          |
| L culmen/declive                                              |           | 24            | -13.5    | -58.5    | -12.5    | 9.88           |
| <i><b>PA-by-Valence</b></i>                                   |           |               |          |          |          |                |
| R dorsolateral frontal gyrus                                  | 8/9       | 72            | 31.5     | 40.5     | 32.5     | 14.50          |
| R dmPFC                                                       | 6/8       | 23            | 7.5      | 31.5     | 56.5     | 9.91           |
| <i><b>Sex</b></i>                                             |           |               |          |          |          |                |
| R middle frontal gyrus                                        | 8         | 34            | 25.5     | 25.5     | 38.5     | 24.97          |
| L paracentral lobule                                          | 4         | 29            | -1.5     | -34.5    | 62.5     | 15.72          |
| <i><b>Valence<sup>^</sup></b></i>                             |           |               |          |          |          |                |
| R middle frontal gyrus                                        | 9         | 42            | 37.5     | 10.5     | 29.5     | 15.64          |
| L middle frontal gyrus                                        |           | 41            | -34.5    | 31.5     | -3.5     | 23.39          |
| L middle frontal gyrus                                        | 9         | 24            | -40.5    | 19.5     | 26.5     | 13.83          |
| R inferior frontal gyrus                                      | 46        | 27            | 5.5      | 28.5     | 14.5     | 18.77          |
| R amygdala/ parahippocampal gyrus                             |           | 31            | 19.5     | -4.5     | -12.5    | 20.85          |
| R parahippocampal gyrus                                       | 36        | 64            | 28.5     | -40.5    | -15.5    | 25.48          |
| L parahippocampal gyrus                                       | 36        | 51            | -25.5    | -43.5    | -6.5     | 28.22          |
| R sTG                                                         | 21        | 31            | 55.5     | -22.5    | 2.5      | 13.87          |
| L uncus                                                       |           | 45            | -34.5    | -7.5     | -24.5    | 18.31          |
| L culmen/ fusiform gyrus/<br>cuneus/ inferior occipital gyrus |           | 1001          | -37.5    | -40.5    | -15.5    | 100.00         |

|                                                               |      |       |       |       |       |        |
|---------------------------------------------------------------|------|-------|-------|-------|-------|--------|
| R culmen/ fusiform gyrus/<br>cuneus/ inferior occipital gyrus |      | 1439  | 40.5  | -40.5 | -18.5 | 100.00 |
| <i>Task</i> <sup>^</sup>                                      |      |       |       |       |       |        |
| R middle frontal gyrus                                        | 9    | 271   | 40.5  | 34.5  | 26.5  | 26.58  |
| R inferior frontal gyrus                                      | 46   | 145   | 52.5  | 25.5  | 14.5  | 29.09  |
| L inferior frontal gyrus                                      | 47   | 338   | -37.5 | 28.5  | -3.5  | 48.91  |
| L superior frontal gyrus                                      | 8    | 21    | -16.5 | 34.5  | 50.5  | 13.06  |
| L medial frontal gyrus                                        | 8    | 111   | -1.5  | 40.5  | 38.5  | 18.45  |
| L ACC                                                         | 32   | 341   | -1.5  | 34.5  | -3.5  | 32.41  |
| R precentral gyrus                                            | 4    | 118   | 28.5  | -25.5 | 50.5  | 33.36  |
| L precentral gyrus                                            | 6    | 29    | -43/5 | -13.5 | 35.5  | 23.12  |
| R paracentral lobule                                          | 6    | 137   | 7.5   | -22.5 | 47.5  | 31.75  |
| L PCC                                                         | 29   | 25    | -7.5  | -49.5 | 11.5  | 19.54  |
| R amygdala/ parahippocampal<br>gyrus                          |      | 49    | 22.5  | -7.5  | -12.5 | 15.10  |
| L parahippocampal gyrus                                       |      | 213   | -31.5 | -31.5 | -6.5  | 31.49  |
| R precuneus                                                   | 31   | 75    | 7.5   | -46.5 | 32.5  | 16.25  |
| L mTG                                                         | 21   | 180   | -49.5 | -4.5  | -15.5 | 21.64  |
| R mTG                                                         | 21   | 43    | 55.5  | 1.5   | -12.5 | 15.10  |
| L sTG                                                         | 39   | 205   | -52.5 | 25.5  | 14.5  | 24.21  |
| R sTG                                                         | 39   | 162   | 43.5  | -49.5 | 17.5  | 19.52  |
| L/R cerebellum/ cuneus/<br>precuneus                          | 7/17 | 16775 | 31.5  | -40.5 | -30.5 | 100.00 |

Activations are effects observed in whole brain analyses significant at  $p < 0.001$ , corrected for multiple comparisons (significant at  $p < 0.05$ ), except <sup>^</sup> $p < 0.0001$  corrected for multiple comparisons (significant at  $p < 0.05$ ).

**eTable 7.** Analysis of Significant Areas of Activation for SA: SA vs EA, PA, EN, and PN

| <b>REGION</b>                                    | <b>BA</b> | <b>Voxels</b> | <b>X</b> | <b>Y</b> | <b>Z</b> | <b>F-value</b> |
|--------------------------------------------------|-----------|---------------|----------|----------|----------|----------------|
|                                                  |           |               |          |          |          |                |
| <i><b>SA-by-Task</b></i>                         |           |               |          |          |          |                |
| R ACC/rmPFC                                      | 24        | 510           | 10.5     | 31.5     | 2.5      | 15.74          |
| R aIC                                            | 13        | 55            | 34.5     | 7.5      | 5.5      | 12.87          |
| L aIC                                            | 13        | 32            | -31.5    | 4.5      | 8.5      | 10.76          |
| R putamen                                        |           | 37            | 13.5     | 7.5      | -0.5     | 11.42          |
| R postcentral gyrus/<br>inferior parietal cortex | 2         | 115           | 43.5     | -22.5    | 44.5     | 16.08          |
| L post/precentral gyrus                          | 6         | 41            | -43.5    | -16.5    | 32.5     | 12.47          |
| R precuneus/PCC                                  | 31        | 24            | 16.5     | -58.5    | 20.5     | 10.80          |
|                                                  |           |               |          |          |          |                |
| <i><b>SA-by-Valence-by-<br/>EA/PA/EN/PN</b></i>  |           |               |          |          |          |                |
| R culmen                                         |           | 34            | 7.5      | -58.5    | -6.5     | 11.21          |
| L PCC                                            | 31        | 43            | -16.5    | -64.5    | 14.5     | 10.19          |
|                                                  |           |               |          |          |          |                |
| <i><b>Valence<sup>^</sup></b></i>                |           |               |          |          |          |                |
| R inferior frontal gyrus                         |           | 55            | 34.5     | 1.5      | 32.5     | 17.47          |
| L parahippocampal gyrus                          |           | 34            | -31.5    | -40.5    | -3.5     | 19.05          |
| R parahippocampal gyrus                          |           | 86            | 28.5     | -46.5    | -6.5     | 26.99          |
| L culmen/ fusiform gyrus/<br>cuneus/ iFG         |           | 484           | -37.5    | -43.5    | -12.5    | 46.15          |
| R culmen/ fusiform gyrus/<br>cuneus/ iFG         |           | 767           | 49.5     | -67.6    | -0.5     | 55.58          |
|                                                  |           |               |          |          |          |                |
| <i><b>SA-by-Valence-by-<br/>EA/PA/EN/PN</b></i>  |           |               |          |          |          |                |
| R culmen                                         |           | 65            | 7.5      | -58.5    | -6.5     | 11.21          |



|                                                 |       |      |       |       |       |        |
|-------------------------------------------------|-------|------|-------|-------|-------|--------|
| L PCC                                           | 31    | 56   | -16.5 | -64.5 | 14.5  | 10.19  |
| <i>Task</i> <sup>^</sup>                        |       |      |       |       |       |        |
| L middle frontal gyrus                          | 9     | 84   | -34.5 | 34.5  | 29.5  | 27.43  |
| L inferior frontal gyrus                        | 45    | 185  | -49.5 | 25.5  | 8.5   | 46.54  |
| L ACC                                           | 24    | 158  | -4.5  | 25.5  | 3.5   | 23.57  |
| L/R postcentral gyrus/<br>ACC/ precentral gyrus |       | 2970 | -49.5 | -22.5 | 47.5  | 100.00 |
| L paracentral lobule                            | 6     | 42   | -4.5  | -28.5 | 65.5  | 22.33  |
| R postcentral gyrus                             | 3     | 21   | 55.5  | -16.5 | 26.5  | 23.32  |
| L ACC                                           | 31    | 71   | -7.5  | -40.5 | 35.5  | 23.37  |
| L/R thalamus/ putamen/<br>caudate               |       | 1858 | -10.5 | -16.5 | 11.5  | 98.79  |
| L parahippocampal gyrus                         | 36    | 48   | -22.5 | -34.5 | -9.5  | 25.12  |
| L mTG                                           | 21    | 34   | -61.5 | -13.5 | -6.5  | 19.77  |
| R inferior parietal lobule                      | 40    | 418  | 40.5  | -34.5 | 41.5  | 44.41  |
| L angular gyrus                                 | 39    | 106  | -49.5 | -64.5 | 32.5  | 23.62  |
| L middle occipital gyrus                        | 19/18 | 128  | -34.5 | -79.5 | -6.5  | 30.62  |
| R inferior occipital gyrus                      | 19    | 51   | 40.5  | -79.5 | -3.5  | 20.69  |
| L cuneus                                        |       | 173  | -10.5 | -67.5 | 8.5   | 30.08  |
| L culmen/ fusiform gyrus                        |       | 204  | -28.5 | -46.5 | -24.5 | 46.57  |
| R culmen/ fusiform gyrus                        |       | 918  | 25.5  | -46.5 | -21.5 | 99.20  |

Activations are effects observed in whole brain analyses significant at  $p < 0.001$ , corrected for multiple comparisons (significant at  $p < 0.05$ ), except <sup>^</sup> $p < 0.0001$  corrected for multiple comparisons (significant at  $p < 0.05$ ).

**eTable 8.** Analysis of Significant Areas of Activation for Neglect: EN vs PN

| <b>REGION</b>                                                          | <b>BA</b> | <b>Voxels</b> | <b>X</b> | <b>Y</b> | <b>Z</b> | <b>F-value</b> |
|------------------------------------------------------------------------|-----------|---------------|----------|----------|----------|----------------|
|                                                                        |           |               |          |          |          |                |
| <i>Sex</i>                                                             |           |               |          |          |          |                |
| L precuneus                                                            | 31/7      | 26            | -13.5    | -70.5    | 29.5     | 17.46          |
| <i>EN-by-Task Condition-by-Valence</i>                                 |           |               |          |          |          |                |
| R superior frontal gyrus                                               |           | 33            | 1.5      | 34.5     | 44.5     | 7.51           |
| R superior frontal gyrus                                               |           | 25            | 43.5     | -67.5    | 32.5     | 8.02           |
| <i>Valence<sup>^</sup></i>                                             |           |               |          |          |          |                |
| R middle frontal gyrus                                                 | 46        | 138           | 52.5     | 31.5     | 14.5     | 22.27          |
| L middle frontal gyrus                                                 |           | 60            | -34.5    | 31.5     | -3.5     | 22.41          |
| L middle frontal gyrus                                                 |           | 46            | -37.5    | 19.5     | 26.5     | 19.24          |
| R inferior frontal gyrus                                               | 47        | 36            | 28.5     | 28.5     | -6.5     | 22.04          |
| L amygdala                                                             |           | 67            | -19.5    | -4.5     | -9.5     | 25.82          |
| L parahippocampal gyrus                                                | 36        | 62            | -28.5    | -40.5    | -6.5     | 23.65          |
| R parahippocampal gyrus                                                | 36        | 58            | 28.5     | -40.5    | -6.5     | 24.45          |
| R sTG                                                                  | 21        | 30            | 64.5     | -22.5    | -0.5     | 12.16          |
| L culmen/ fusiform gyrus/ cuneus/<br>inferior occipital gyrus/amygdala |           | 1223          | -37.5    | -37.5    | -15.5    | 100.00         |
| R culmen/ fusiform gyrus/ cuneus/<br>inferior occipital gyrus/amygdala |           | 1630          | 40.5     | -40.5    | -21.5    | 100.00         |
| <i>Task<sup>^</sup></i>                                                |           |               |          |          |          |                |

|                                   |    |       |       |       |       |        |
|-----------------------------------|----|-------|-------|-------|-------|--------|
| L inferior frontal gyrus          |    | 319   | -40.5 | 28.5  | -3.5  | 46.07  |
| R inferior frontal gyrus          | 46 | 159   | 52.5  | 25.5  | 14.5  | 31.54  |
| R middle frontal gyrus            | 9  | 264   | 37.5  | 31.5  | 32.5  | 25.73  |
| L superior frontal gyrus          | 6  | 26    | -19.5 | 25.5  | 53.5  | 13.37  |
| L ACC                             | 32 | 290   | -4.5  | 34.5  | -3.5  | 29.79  |
| R precentral gyrus                | 4  | 106   | 28.5  | -25.5 | 50.5  | 31.40  |
| L precentral gyrus                |    | 36    | -40.5 | -13.5 | 35.5  | 27.60  |
| L paracentral lobule              |    | 149   | -4.5  | -31.5 | 59.5  | 33.52  |
| L PCC                             | 23 | 131   | -4.5  | -28.5 | 26.5  | 37.19  |
| L PCC                             | 31 | 93    | -7.5  | -40.5 | 38.5  | 20.86  |
| L PCC                             |    | 28    | -7.5  | -49.5 | 11.5  | 18.07  |
| R amygdala/ parahippocampal gyrus |    | 50    | 19.5  | -4.5  | -15.5 | 27.87  |
| L amygdala/ parahippocampal gyrus |    | 224   | -31.5 | -31.5 | -9.5  | 35.66  |
| L mTG                             |    | 162   | -49.5 | -4.5  | -15.5 | 22.56  |
| R mTG                             | 21 | 108   | 58.5  | -43.5 | 2.5   | 15.21  |
| L sTG                             | 39 | 236   | -52.5 | -61.5 | 29.5  | 22.64  |
| R sTG                             | 21 | 73    | 49.5  | 1.5   | -12.5 | 20.96  |
| L/R cerebellum/ cuneus/ precuneus |    | 16310 | 31.5  | -43.5 | -30.5 | 100.00 |

Activations are effects observed in whole brain analyses significant at  $p < 0.001$ , corrected for multiple comparisons (significant at  $p < 0.05$ ), except  $\wedge p < .0001$  corrected for multiple comparisons (significant at  $p < 0.05$ ).

**eTable 9.** Analysis of Significant Areas of Activation for Abuse as the Only Covariate

| <b>REGION</b>                                  | <b>BA</b> | <b>Voxels</b> | <b>X</b> | <b>Y</b> | <b>Z</b> | <b>F-value</b> |
|------------------------------------------------|-----------|---------------|----------|----------|----------|----------------|
| <i>Abuse-by-Task Condition</i>                 |           |               |          |          |          |                |
| L rmPFC^^                                      | 9         | 27            | -13.5    | 49.5     | 23.5     | 10.30          |
| R mid-cingulate cortex                         | 31/6      | 58            | 7.5      | -22.5    | 47.5     | 15.24          |
| R post/precentral gyrus/ premotor cortex gyrus | 2         | 235           | 52.5     | -19.5    | 44.5     | 13.60          |
| L post/precentral gyrus/ premotor cortex gyrus | 43        | 134           | -55.5    | -10.5    | 20.5     | 15.71          |
| L mTG                                          | 21        | -55.5         | -13.5    | -13.5    | -6.5     | 12.03          |
| L sTG                                          | 22        | 43            | -43.5    | -37.5    | 2.5      | 13.38          |
| L culmen                                       |           | 48            | -22.5    | -46.5    | -21.5    | 11.11          |
| R insula                                       | 13        | 27            | 46.5     | -7.5     | 14.5     | 13.23          |
| <i>Sex</i>                                     |           |               |          |          |          |                |
| R middle frontal gyrus                         | 8         | 54            | 25.5     | 25.5     | 38.5     | 25.63          |
| L dmFC                                         | 32        | 24            | -1.5     | 10.5     | 38.5     | 16.09          |
| L pre/postcentral gyrus/                       | 6         | 109           | -49.5    | -7.5     | 23.5     | 11.16          |
| R inferior parietal lobule                     | 40        | 24            | 37.5     | -49.5    | 47.5     | 17.45          |
| <i>Valence^</i>                                |           |               |          |          |          |                |
| L middle frontal gyrus                         |           | 57            | -34.5    | 31.5     | -3.5     | 27.60          |
| L middle frontal gyrus                         | 9         | 47            | -40.5    | 19.5     | 26.5     | 16.75          |
| R inferior frontal gyrus                       | 9         | 164           | 34.5     | 7.5      | 29.5     | 24.57          |
| R inferior frontal gyrus                       | 47        | 24            | 28.5     | 28.5     | -6.5     | 19.42          |

|                                                                          |    |      |       |       |       |        |
|--------------------------------------------------------------------------|----|------|-------|-------|-------|--------|
| L amygdala                                                               |    | 74   | -19.5 | -4.5  | -9.5  | 27.67  |
| L parahippocampal gyrus                                                  |    | 83   | -31.5 | -40.5 | -3.5  | 32.00  |
| R parahippocampal gyrus                                                  |    | 76   | 28.5  | -40.5 | -6.5  | 28.49  |
| R sTG                                                                    | 22 | 38   | 64.5  | -19.5 | 2.5   | 13.66  |
| L/R culmen/ fusiform gyrus/ cuneus/<br>inferior occipital gyrus/amygdala |    | 3286 | 40.5  | -40.5 | -21.5 | 100.00 |
| <b>Task<sup>^</sup></b>                                                  |    |      |       |       |       |        |
| R inferior frontal gyrus                                                 | 46 | 203  | 52.5  | 25.5  | 14.5  | 35.80  |
| L inferior frontal gyrus                                                 | 47 | 411  | -37.5 | 28.5  | -3.5  | 61.22  |
| R medial frontal gyrus                                                   | 9  | 203  | 4.5   | 43.5  | 32.5  | 16.30  |
| L ACC                                                                    | 32 | 407  | -4.5  | 43.5  | -0.5  | 37.81  |
| L precentral gyrus                                                       | 6  | 47   | -43.5 | -13.5 | 35.5  | 34.25  |
| L paracentral lobule                                                     | 6  | 163  | -4.5  | -31.5 | 59.5  | 38.01  |
| L PCC                                                                    | 23 | 165  | -4.5  | -28.5 | 26.5  | 62.18  |
| L PCC                                                                    | 29 | 36   | -7.5  | -49.5 | 11.5  | 22.80  |
| R amygdala/ parahippocampal gyrus                                        |    | 60   | 19.5  | -4.5  | -15.5 | 36.93  |
| L amygdala/ parahippocampal gyrus                                        |    | 242  | -28.5 | -28.5 | -12.5 | 33.10  |
| R precuneus                                                              | 31 | 104  | 7.5   | -46.5 | 32.5  | 19.15  |
| L mTG                                                                    | 22 | 36   | -52.5 | -40.5 | 2.5   | 14.29  |

|                                   |    |       |       |       |       |        |
|-----------------------------------|----|-------|-------|-------|-------|--------|
| L mTG                             | 21 | 220   | -49.5 | -4.5  | -15.5 | 24.88  |
| R mTG                             | 21 | 207   | 58.5  | -43.5 | 2.5   | 20.22  |
| R mTG                             | 21 | 106   | 55.5  | -7.5  | -9.5  | 21.11  |
| L sTG                             | 39 | 249   | -52.5 | -61.5 | 29.5  | 28.55  |
| L/R cerebellum/ cuneus/ precuneus |    | 19498 | -28.5 | -40.5 | -27.5 | 100.00 |

Activations are effects observed in whole brain analyses significant at  $p < 0.001$ , corrected for multiple comparisons (significant at  $p < 0.05$ ), except  $^{\wedge}p < 0.0001$  and  $^{\wedge\wedge}p < 0.002$  corrected for multiple comparisons (significant at  $p < 0.05$ ).

**eTable10.** Analysis of Significant Areas of Activation for Neglect as the Only Covariate

| <b>REGION</b>                                                          | <b>BA</b> | <b>Voxels</b> | <b>X</b> | <b>Y</b> | <b>Z</b> | <b>F-value</b> |
|------------------------------------------------------------------------|-----------|---------------|----------|----------|----------|----------------|
| <i>Neglect-by-Task Condition</i>                                       |           |               |          |          |          |                |
| L middle temporal gyrus                                                | 21        | 32            | -55.5    | -13.5    | -6.5     | 13.02          |
| <i>Sex</i>                                                             |           |               |          |          |          |                |
| R middle frontal gyrus                                                 | 8         | 54            | 25.5     | 25.5     | 38.5     | 25.89          |
| R paracentral lobule                                                   | 4         | 31            | 7.5      | -34.5    | 62.5     | 17.11          |
| L precuneus                                                            | 31        | 24            | -10.5    | -70.5    | 26.5     | 18.82          |
| <i>Valence<sup>^</sup></i>                                             |           |               |          |          |          |                |
| L middle frontal gyrus                                                 |           | 58            | -34.5    | 31.5     | -3.5     | 27.54          |
| L middle frontal gyrus                                                 | 9         | 47            | -40.5    | 19.5     | 26.5     | 16.85          |
| R inferior frontal gyrus                                               |           | 167           | 34.5     | 7.5      | -29.5    | 24.15          |
| R inferior frontal gyrus                                               | 47        | 24            | 28.5     | 28.5     | -6.5     | 19.89          |
| L amygdala/parahippocampal gyrus                                       |           | 73            | -19.5    | -4.5     | -9.5     | 27.59          |
| R parahippocampal gyrus                                                | 36        | 76            | 28.5     | -40.5    | -6.5     | 28.39          |
| L parahippocampal gyrus                                                | 19        | 82            | -31.5    | -40.5    | -3.5     | 31.61          |
| R sTG                                                                  | 22        | 38            | 61.5     | -19.5    | 2.5      | 13.66          |
| L/R culmen/ fusiform gyrus/ cuneus/ inferior occipital gyrus/ amygdala |           | 3286          | 40.5     | -40.5    | -21.5    | 100.00         |
| <i>Task<sup>^</sup></i>                                                |           |               |          |          |          |                |
| L inferior frontal gyrus                                               |           | 408           | -40.5    | 28.5     | -3.5     | 59.35          |
| R inferior frontal gyrus                                               | 46        | 202           | 52.5     | 25.5     | 14.5     | 35.48          |
| R medial frontal gyrus                                                 | 9         | 148           | 4.5      | 43.5     | 32.5     | 15.71          |



|                                                |    |       |       |       |       |        |
|------------------------------------------------|----|-------|-------|-------|-------|--------|
| L superior frontal gyrus                       | 8  | 35    | -16.5 | 34.5  | 50.5  | 14.60  |
| L ACC                                          | 32 | 410   | -4.5  | 43.5  | -0.5  | 37.46  |
| L PCC                                          | 23 | 166   | -4.5  | -28.5 | 26.5  | 63.10  |
| L PCC                                          | 29 | 36    | -7.5  | -49.5 | 11.5  | 22.32  |
| R amygdala/ parahippocampal gyrus              |    | 59    | 19.5  | -4.5  | -15.5 | 36.92  |
| L parahippocampal gyrus/ amygdala              |    | 238   | -28.5 | -28.5 | -12.5 | 32.38  |
| R precentral gyrus                             | 4  | 118   | 28.5  | -25.5 | 50.5  | 35.74  |
| L precentral gyrus                             | 6  | 45    | -40.5 | -13.5 | 35.5  | 34.15  |
| L paracentral lobule                           | 6  | 163   | -4.5  | -31.5 | 59.5  | 38.10  |
| R precuneus                                    |    | 105   | 7.5   | -46.5 | 32.5  | 19.34  |
| L sTG                                          | 39 | 247   | -52.5 | -61.5 | 29.5  | 28.40  |
| R mTG                                          | 21 | 106   | 55.5  | -7.5  | -9.5  | 20.99  |
| L mTG                                          | 21 | 222   | -49.5 | -4.5  | -15.5 | 23.84  |
| R mTG                                          | 21 | 210   | 58.5  | -43.5 | 2.5   | 20.25  |
| L mTG                                          | 21 | 34    | -61.5 | -40.5 | 2.5   | 14.21  |
| L/R cerebellum/cuneus/precuneus                |    | 19540 | -28.5 | -40.5 | -27.5 | 100.00 |
| <b><i>Neglect-by-Task Condition-by-Sex</i></b> |    |       |       |       |       |        |
| L precuneus                                    |    | 30    | -22.5 | -52.5 | 53.5  | 10.49  |
| R cuneus                                       | 18 | 28    | 13.5  | -70.5 | 17.5  | 13.66  |

Activations are effects observed in whole brain analyses significant at  $p < 0.001$ , corrected for multiple comparisons (significant at  $p < 0.05$ ), except  $^{\wedge}p < 0.0001$  corrected for multiple comparisons (significant at  $p < 0.05$ ).
